# Supplementary material
Source: PubMed Central journal article supplement (PMC9288472)

# PLATELET ACTIVATION

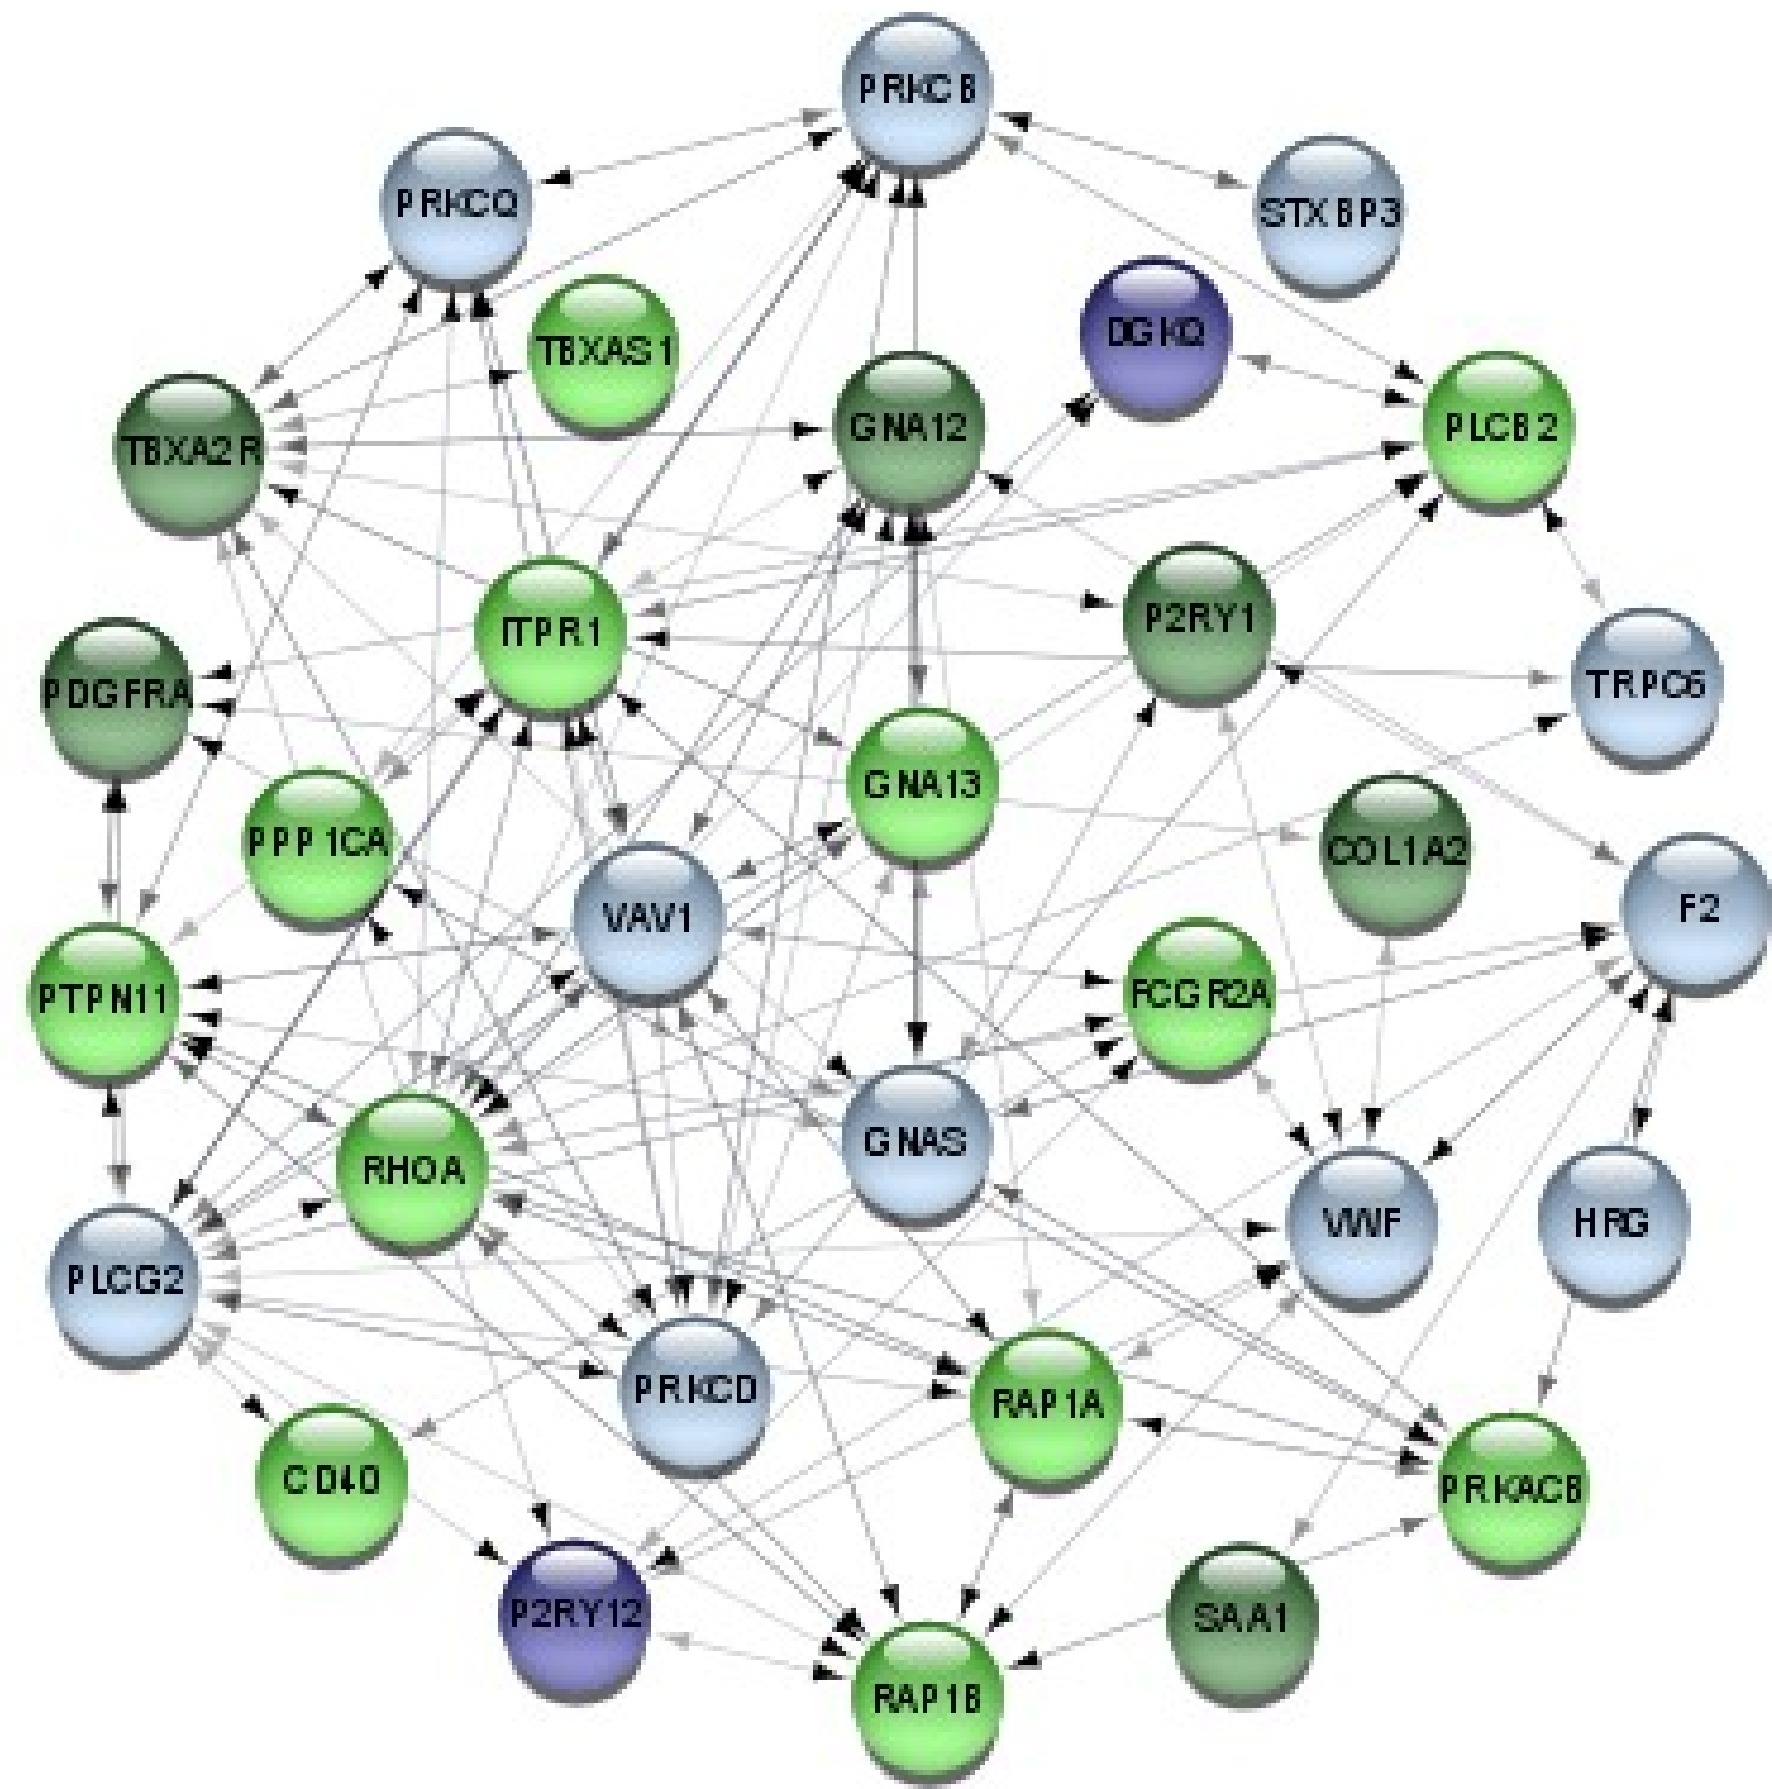

# VESICLE-MEDIATED TRANSPORT

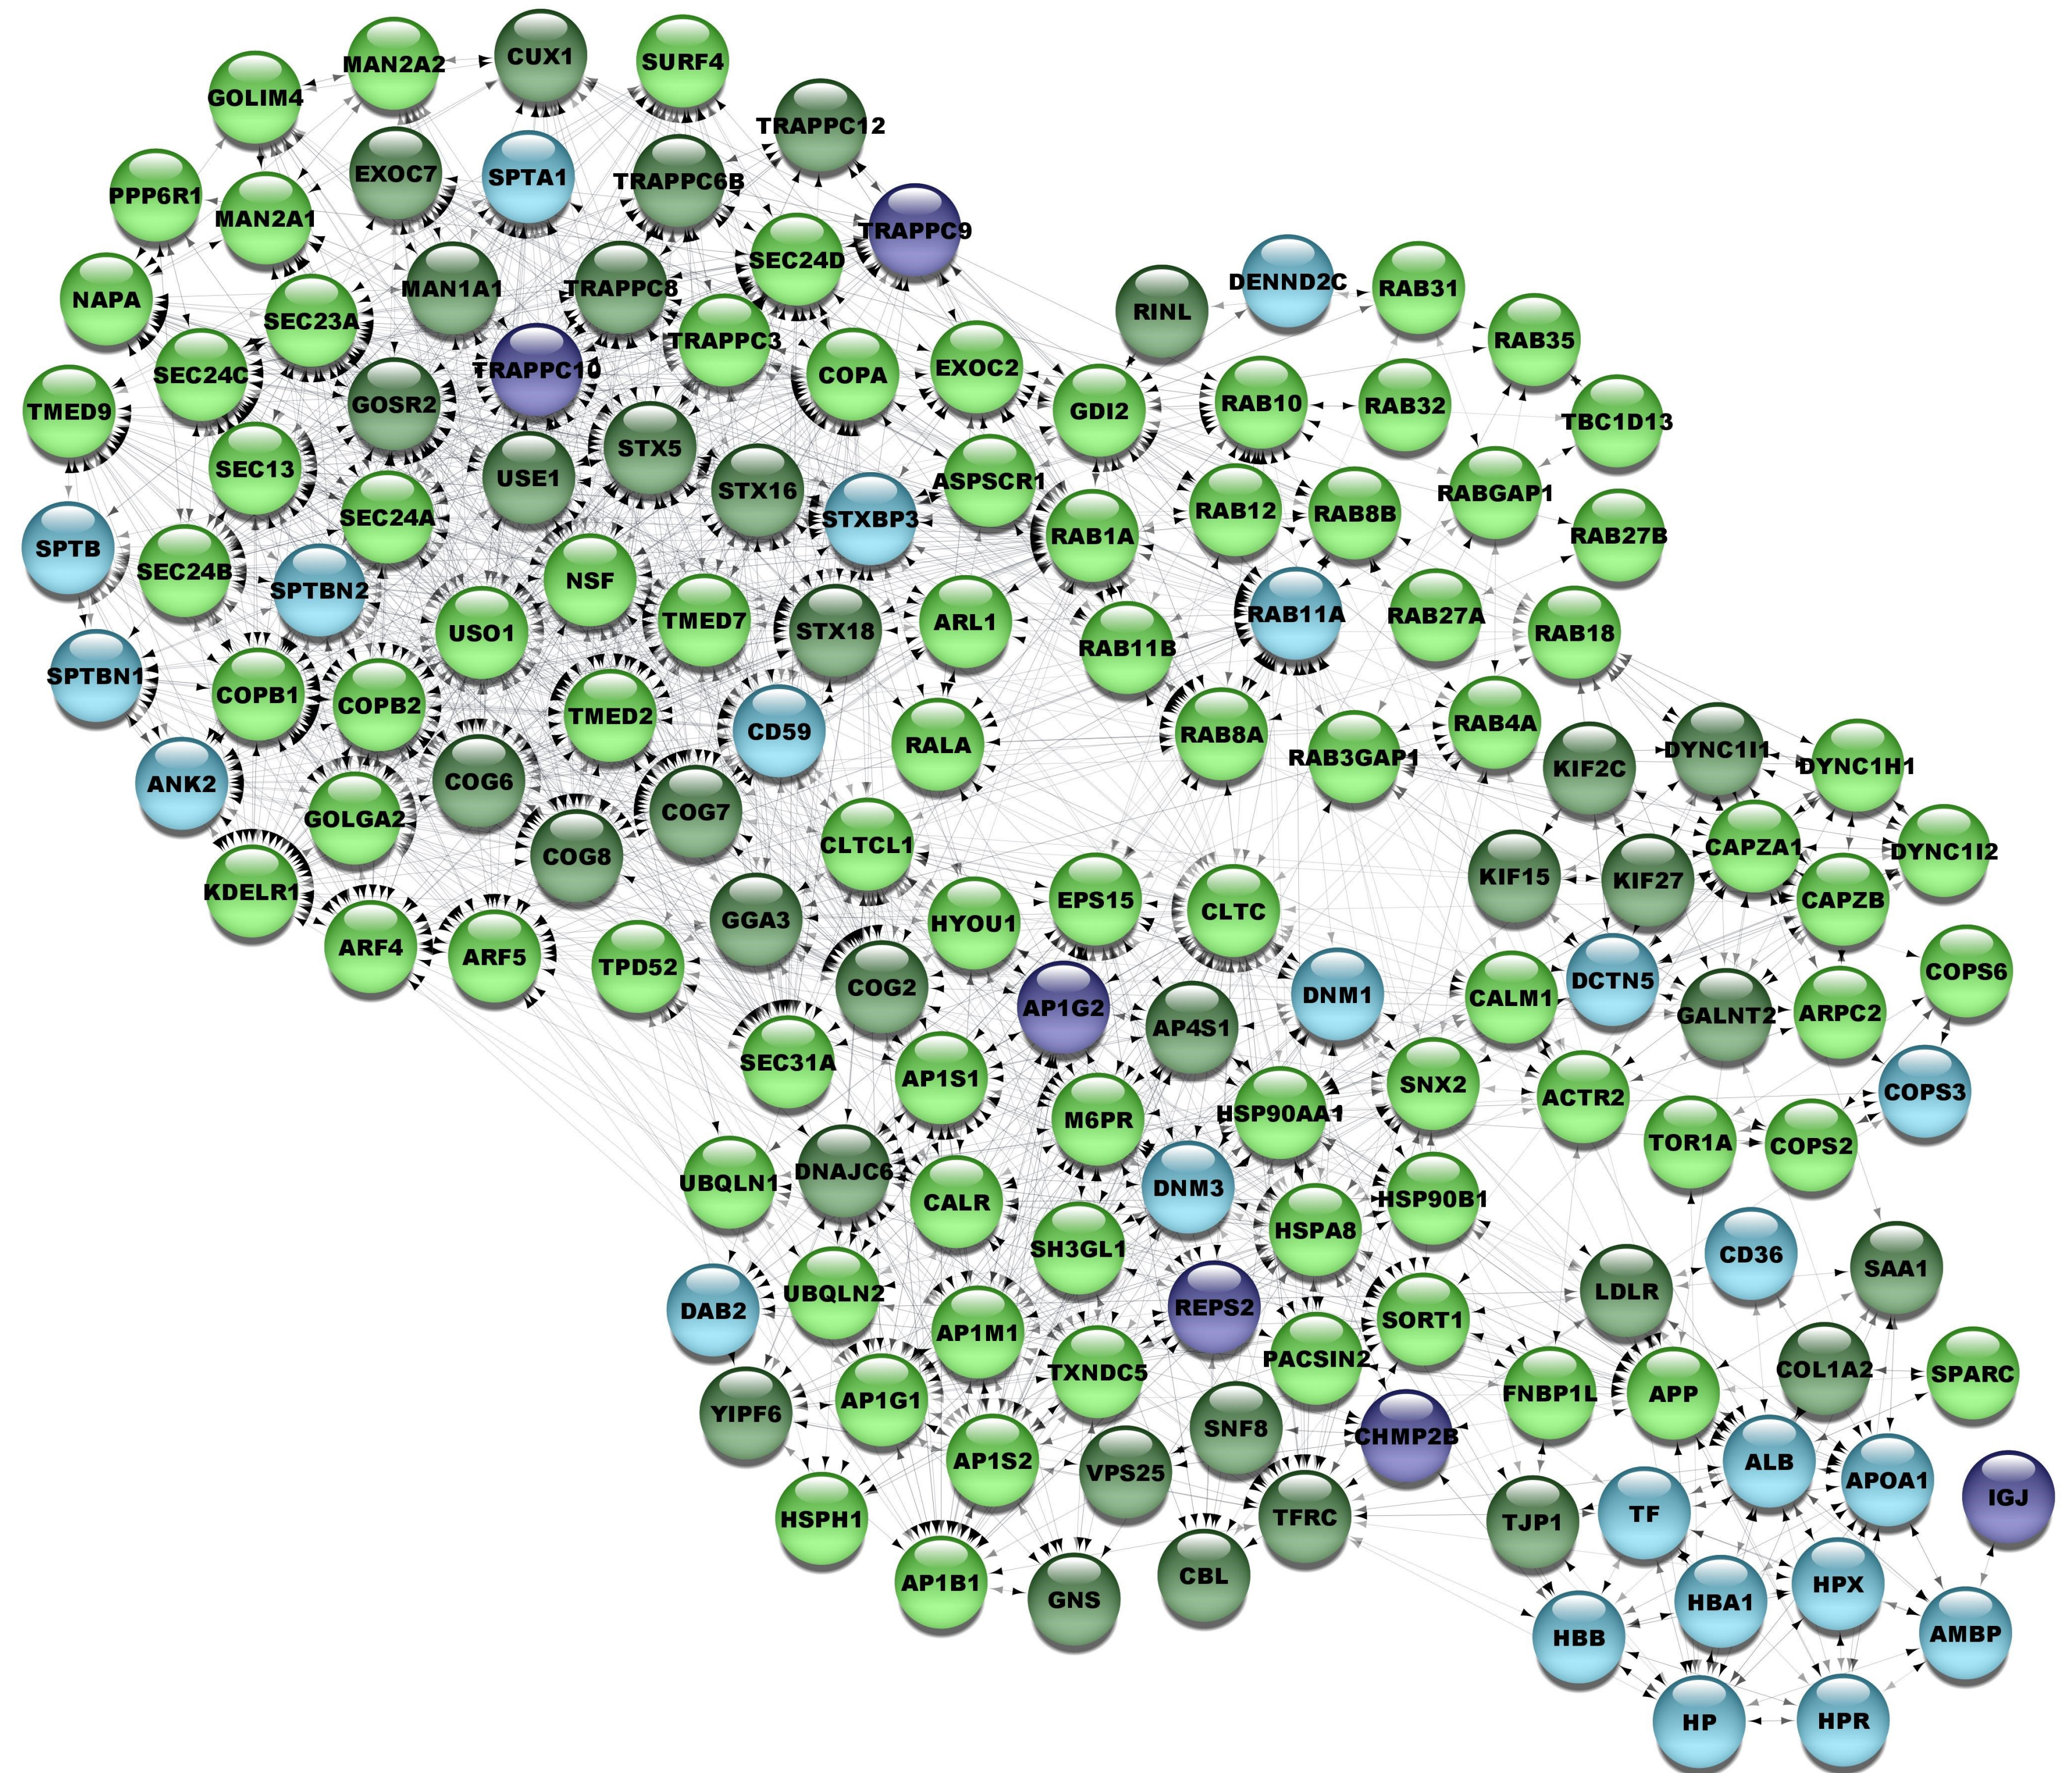

Supplement: 41420_2022_1122_MOESM5_ESM.pdf [file 41420_2022_1122_MOESM5_ESM.pdf]
