# Supplementary material
Source: PubMed Central journal article supplement (PMC9288472)

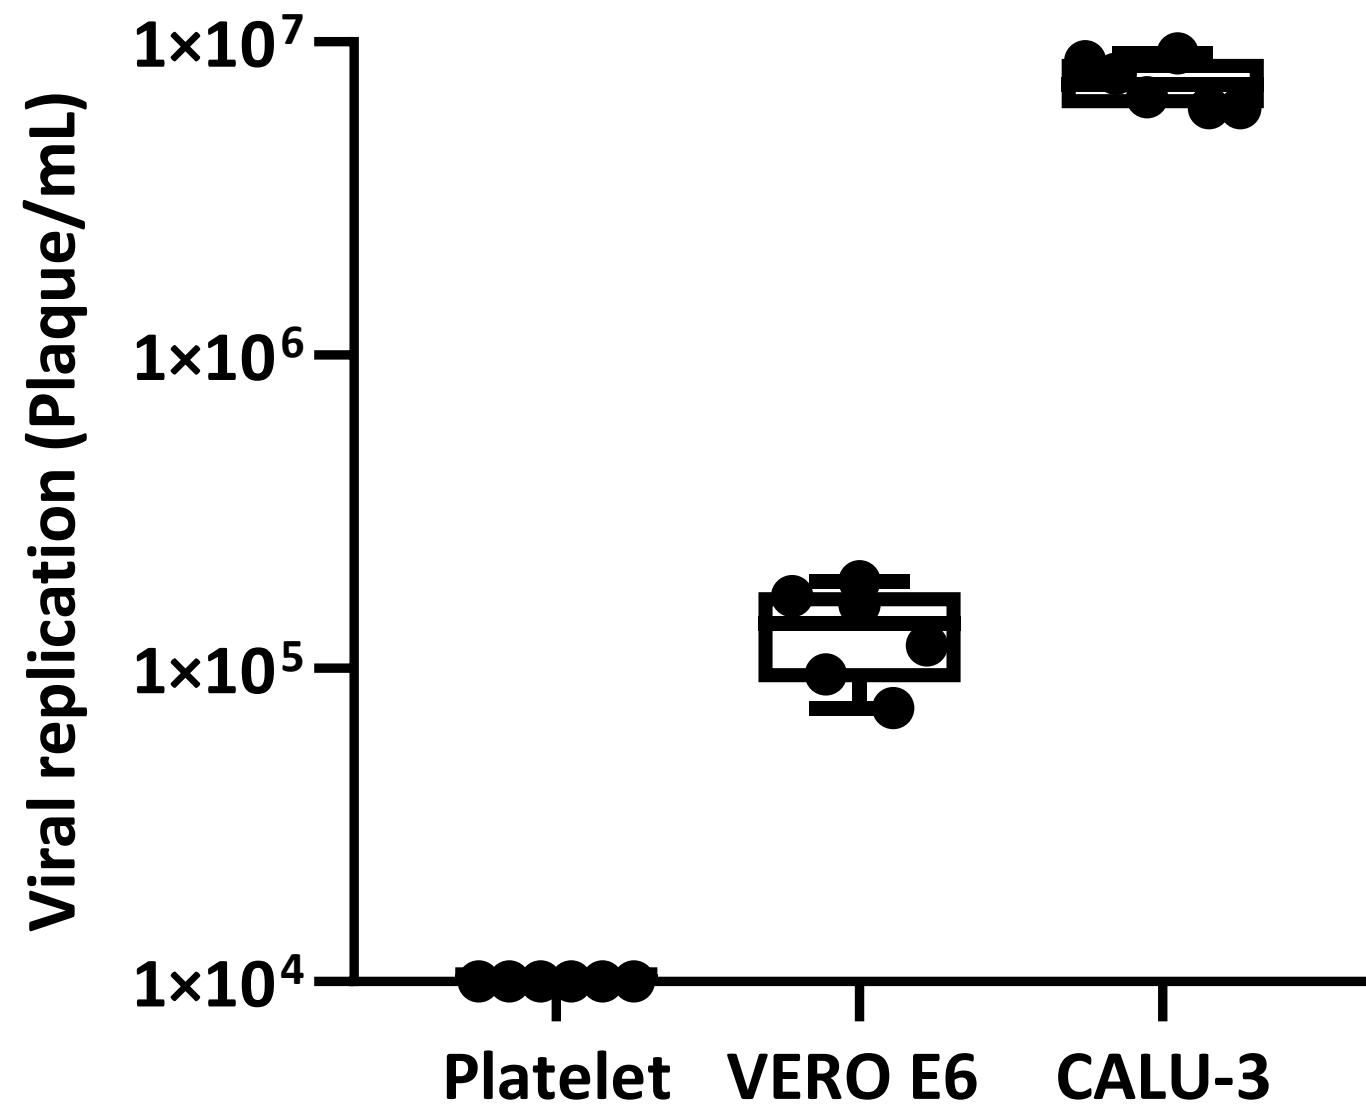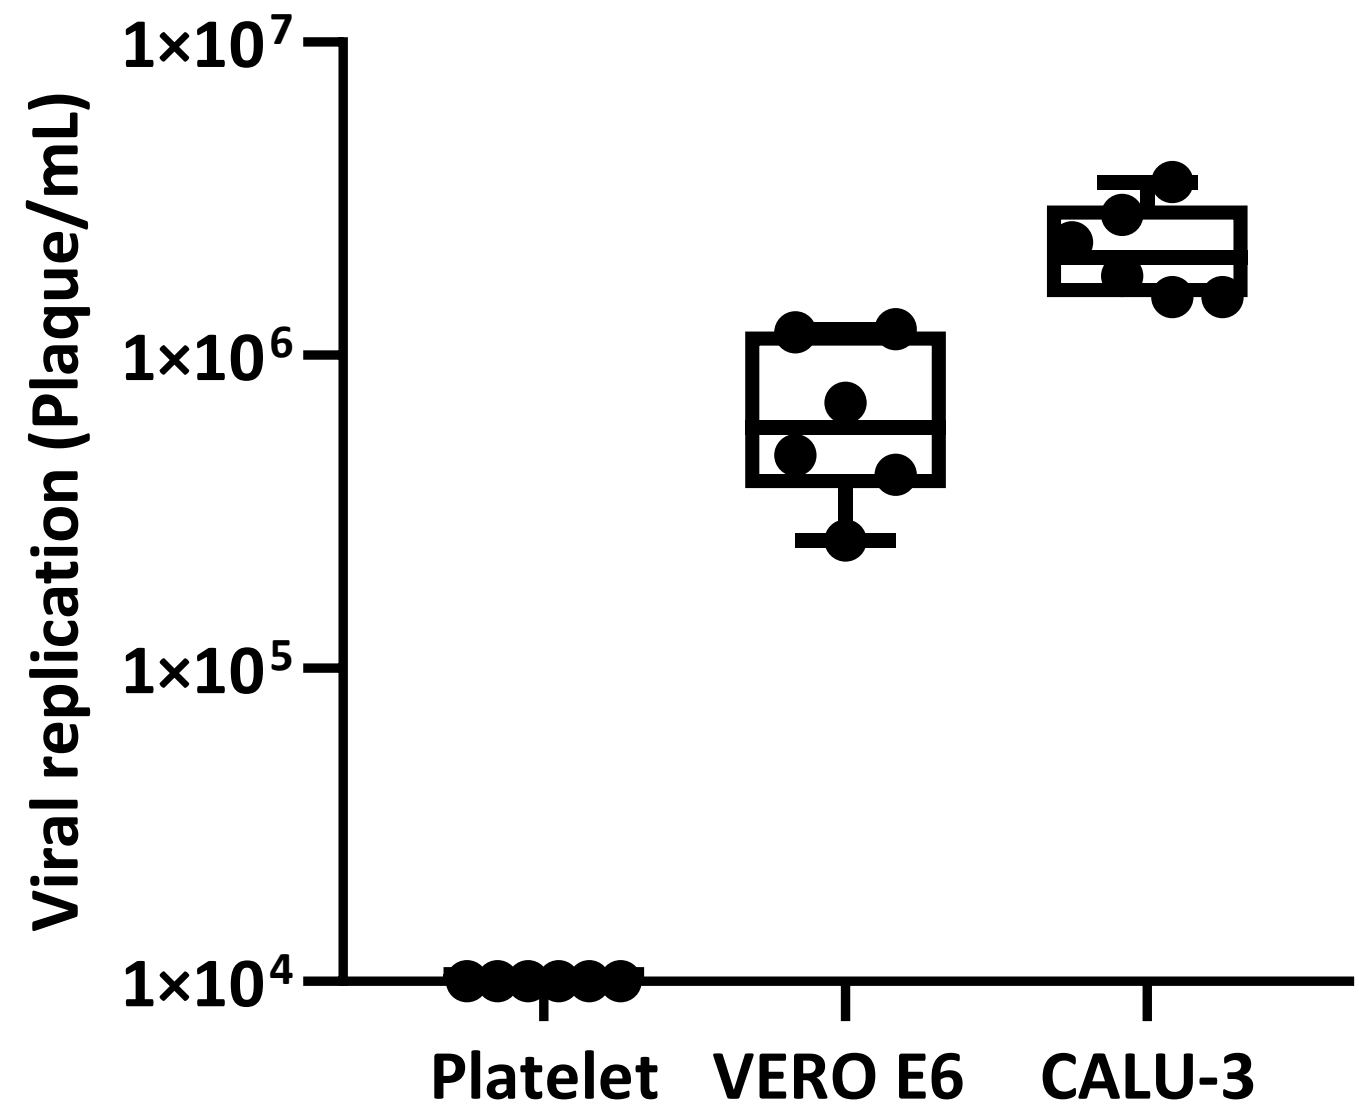

Supplement: 41420_2022_1122_MOESM6_ESM.pdf [file 41420_2022_1122_MOESM6_ESM.pdf]
