# Supplementary material
Source: PubMed Central journal article supplement (PMC9288472)

**Supplemental Figure 3:** Original western blot images of caspase 4; IFITM-1; ISG15 and  $\beta$ -actin in platelets isolated from three controls and nine patients with severe COVID-19.

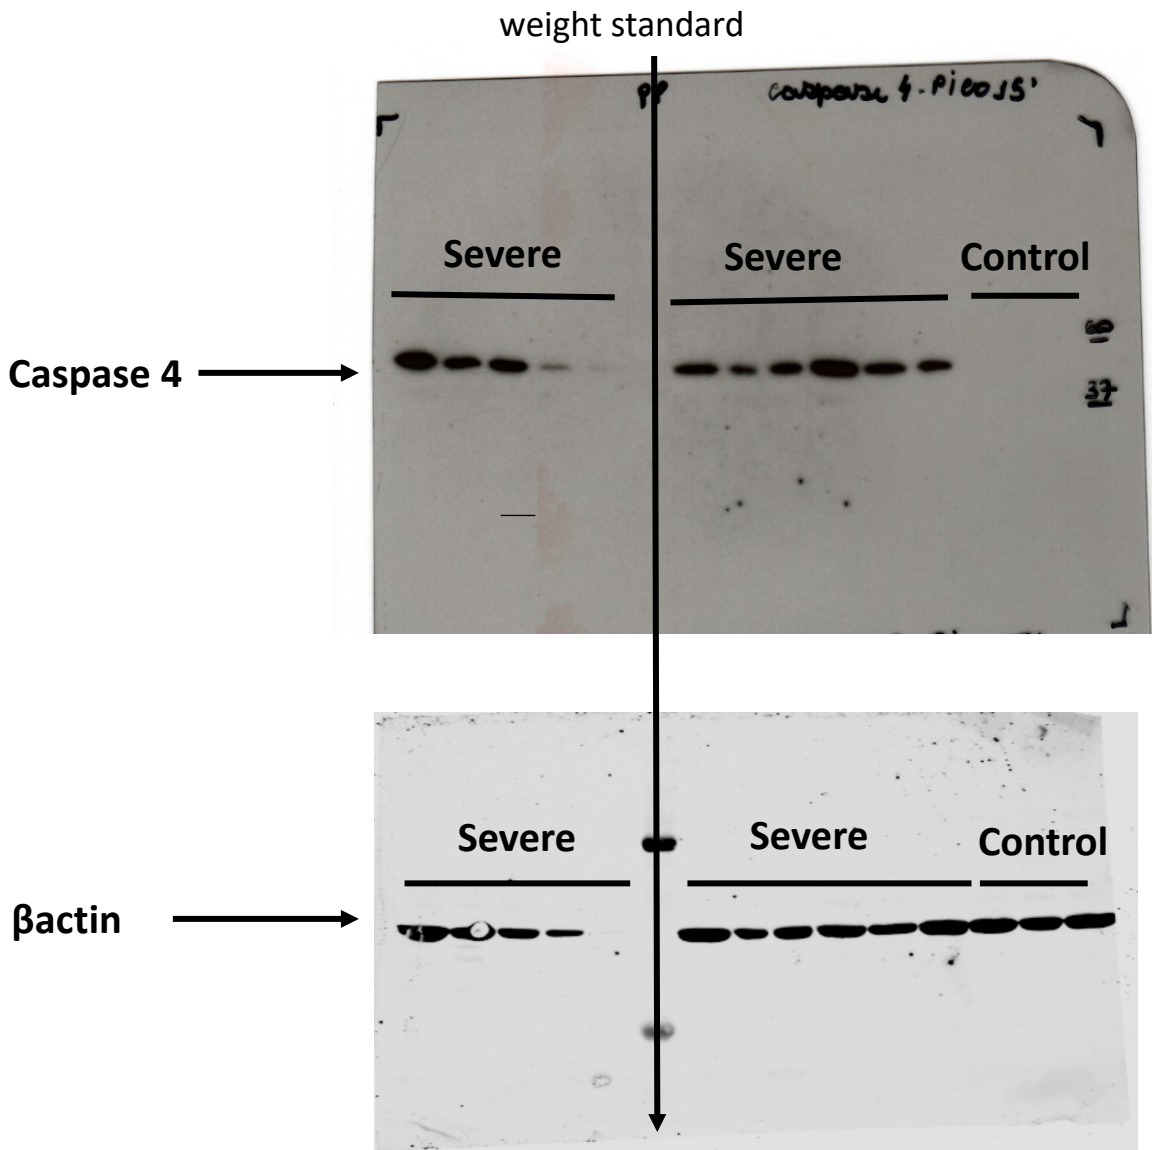

weight standard

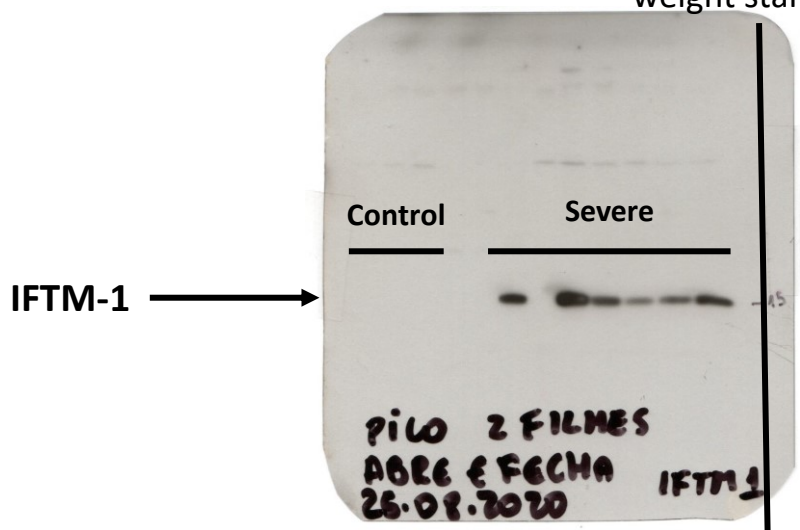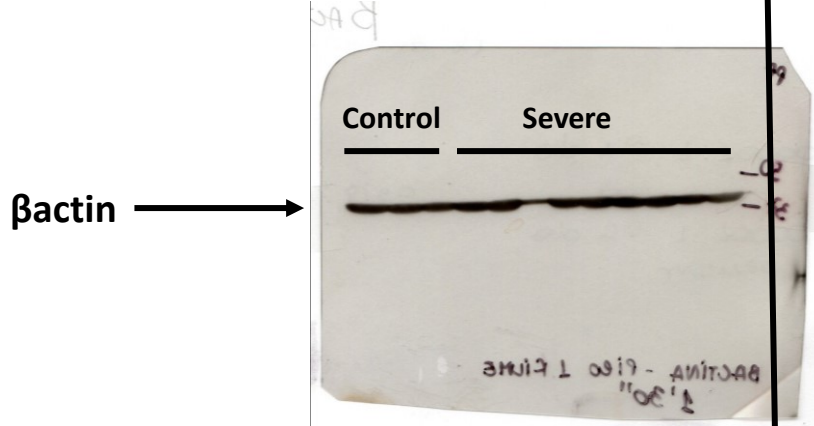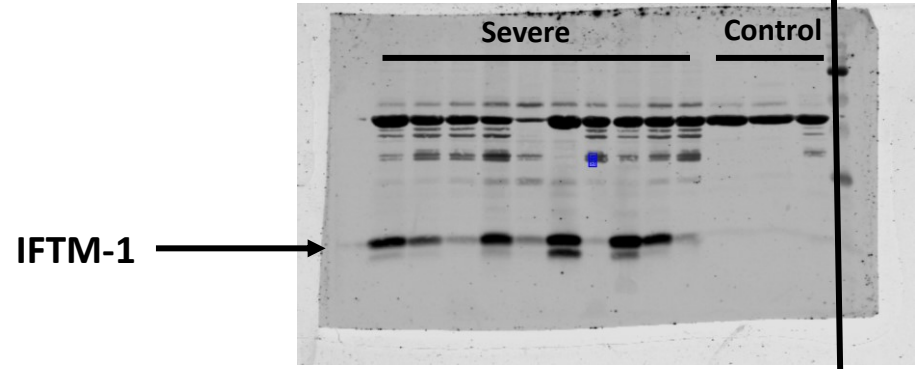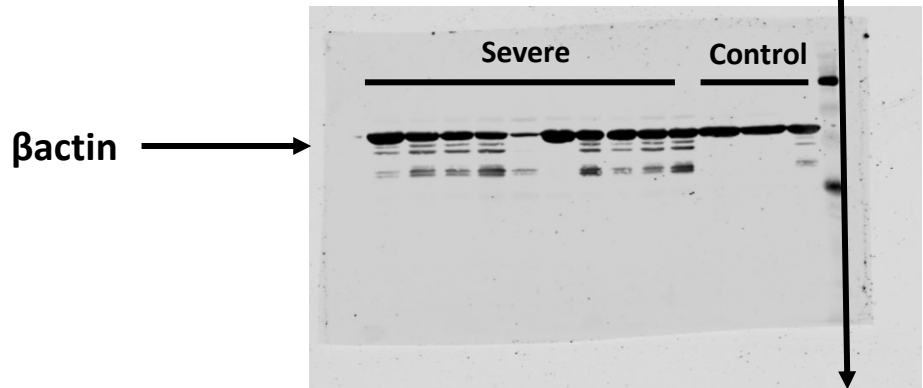

weight standard

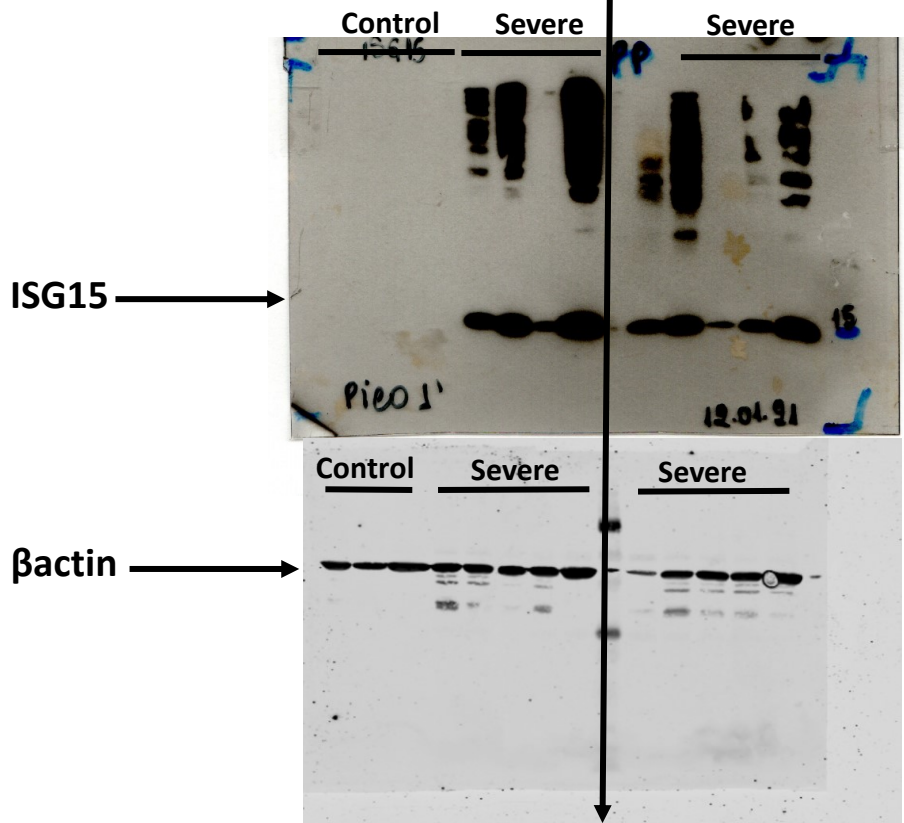

weight standard

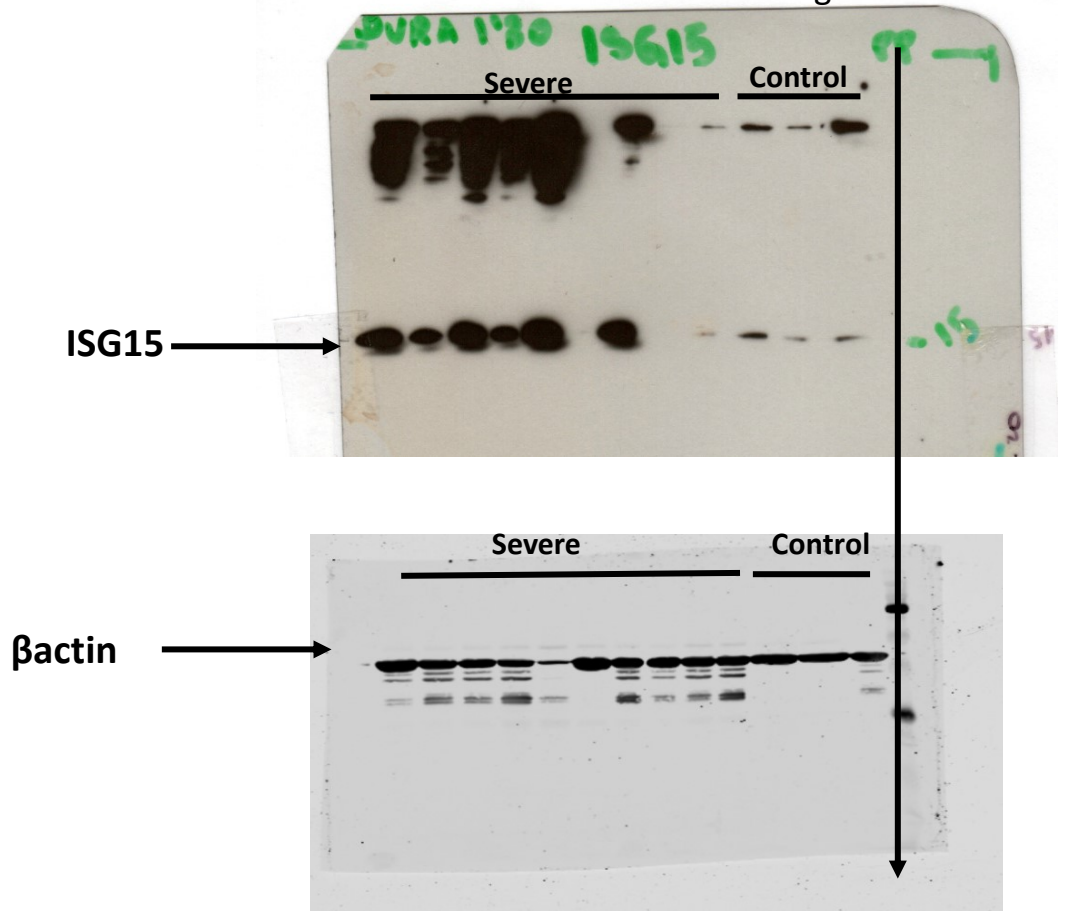

Supplement: 41420_2022_1122_MOESM7_ESM.pdf [file 41420_2022_1122_MOESM7_ESM.pdf]
